# Supplementary material
Source: Springer Nature journal article supplement (https://www.springermedizin.de/resource/supplementary/12879_2012_2124_MOESM3_ESM.pdf/9443562)

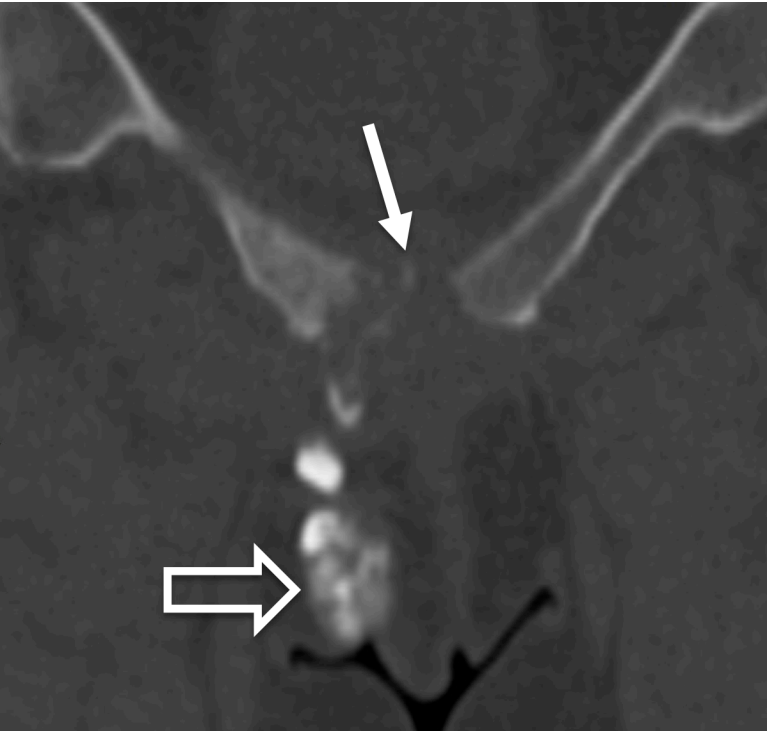

Supplement: MOESM3 [file 9443562]
